# Supplementary material for: Melatonin Alleviates the Impairment of Muscle Bioenergetics and Protein Quality Control Systems in Leptin-Deficiency-Induced Obesity
Source: MDPI journal article supplement (doi:10.3390/antiox12111962), 2023-11-03
Supplement: s1 [file s1]

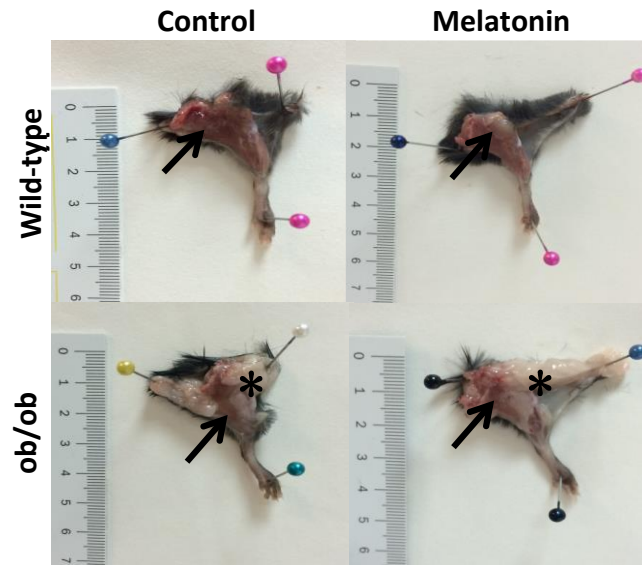

**Figure S1. Macroscopic images of lower limb.** Note the presence of a high amount of fat mass (asterisks) in ob/ob mice. Note that the color of skeletal muscle shifted from dark red in wild-type to pale red in ob/ob (arrows) which could be due to an increase in fat infiltration.

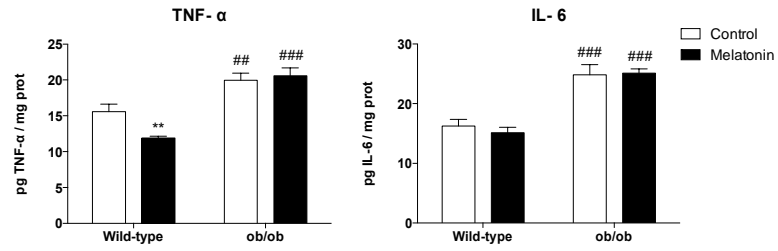

**Figure S2. Leptin deficiency triggers an inflammatory response.** Inflammation levels through the determination of TNF- $\alpha$  and IL-6 markers. Data are means  $\pm$  SD. Statistical comparisons: # wild-type vs. ob/ob; \* control vs. melatonin. The main effects of leptin deficiency and melatonin treatment were detected using a two-way ANOVA ( $n = 8$ ). The number of symbols marks the level of statistical significance: one for  $P < 0.05$ , two for  $P < 0.01$ , and three for  $P < 0.001$ .

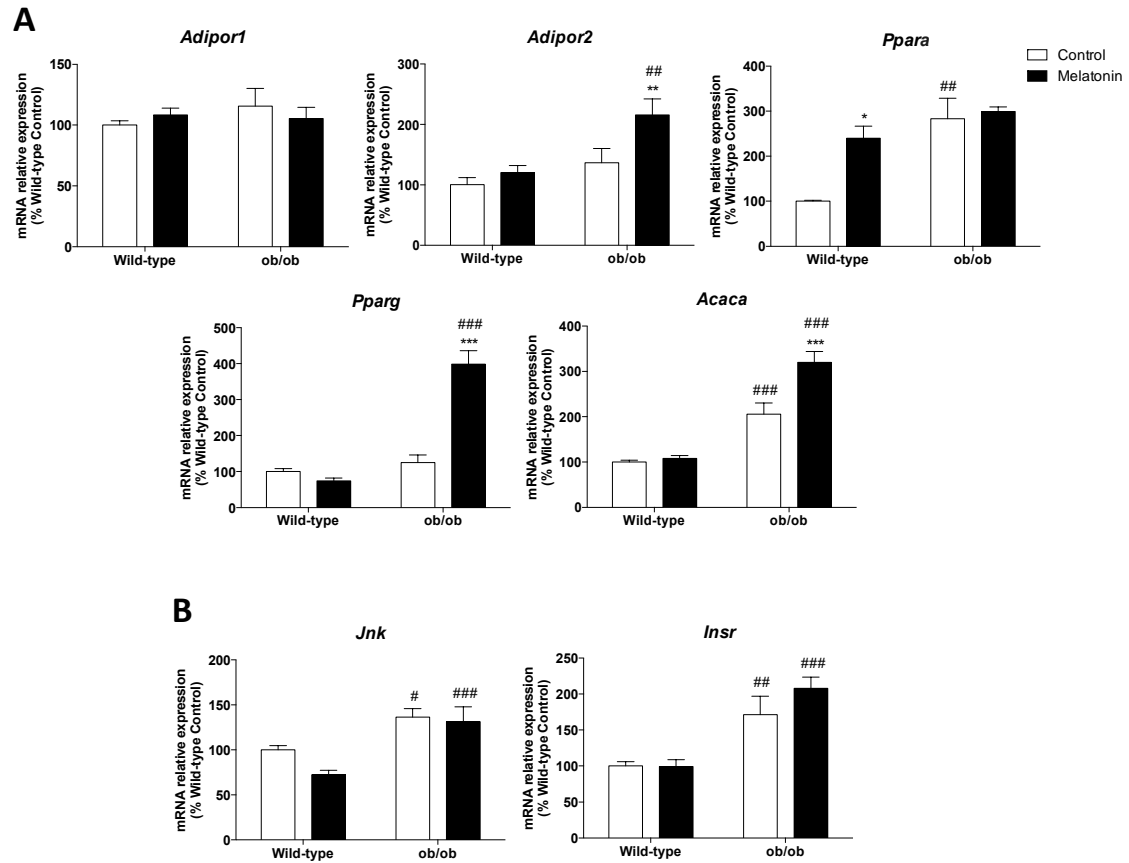

**Figure S3. Melatonin remodels fatty acid metabolism in skeletal muscle from ob/ob mice.** A, Relative mRNA expression of genes involved in  $\beta$ -oxidation (*Adipor1*, *Adipor2*, and *Ppara*) and in fatty acid synthesis (*Pparg* and *Acaca*) pathways. Data are means  $\pm$  SD expressed as a percentage of wild-type control mice. B, Relative mRNA expression of genes implicated in insulin signaling (*Jnk* and *Insr*). Data are mean  $\pm$  SD expressed as a percentage of wild-type control mice. Statistical comparisons: # wild-type vs. ob/ob; \*Control vs. melatonin. The main effects of leptin deficiency and melatonin treatment were detected by two-way ANOVA (n = 8). The number of symbols marks the level of statistical significance: one for  $P < 0.05$ , two for  $P < 0.01$  and three for  $P < 0.001$ .

**Table S1. Anthropometric indicators of leptin-deficiency-induced obesity.**

|                                                                                | Wild-type      |                | ob/ob           |     |                  |     |
|--------------------------------------------------------------------------------|----------------|----------------|-----------------|-----|------------------|-----|
|                                                                                | Control        | Melatonin      | Control         |     | Melatonin        |     |
| <b>N</b>                                                                       | 8              | 8              | 8               |     | 8                |     |
| <b>Food intake (g/day)</b>                                                     | 3.27 ± 0.07    | 3.02 ± 0.22    | 4.82 ± 0.17     | ### | 5.17 ± 0.47      | ### |
| <b>Body weight at baseline (g)</b>                                             | 17.69 ± 1.37   | 17.69 ± 1.68   | 34.95 ± 2.93    | ### | 32.74 ± 2.67     | ### |
| <b>Body weight at sacrifice (g)</b>                                            | 25.57 ± 0.94   | 23.98 ± 1.16   | 50.08 ± 3.82    | ### | 49.58 ± 2.59     | ### |
| <b>Body weight changes (g)</b>                                                 | 6.80 ± 1.54    | 6.30 ± 0.57    | 15.13 ± 1.85    | ### | 16.84 ± 2.01     | ### |
| <b>Muscle weight at sacrifice (g)</b>                                          | 3.61 ± 0.36    | 3.66 ± 0.14    | 2.64 ± 0.07     | ### | 2.60 ± 0.19      | ### |
| <b>Peripheral Fat weight at sacrifice (g)</b>                                  | 0.37 ± 0.06    | 0.38 ± 0.03    | 7.36 ± 0.54     | ### | 8.34 ± 1.10      | ### |
| <b>Lower limb perimeter (cm)</b>                                               | 2.53 ± 0.24    | 2.68 ± 0.24    | 6.98 ± 0.67     | ### | 7.00 ± 0.66      | ### |
| <b>Body Mass Index (BMI) (kg/m<sup>2</sup>)</b>                                | 3.53 ± 0.13    | 3.32 ± 0.16    | 6.18 ± 0.47     | ### | 6.21 ± 0.07      | ### |
| <b>Skeletal Muscle Index (SMI) (%)</b>                                         | 13.08 ± 2.02   | 14.69 ± 1.46   | 4.98 ± 0.67     | ### | 5.11 ± 0.40      | ### |
| <b>Fat Mass Index (FMI) (g/m<sup>2</sup>)</b>                                  | 51.87 ± 8.66   | 53.15 ± 3.62   | 948.15 ± 105.54 | ### | 1195.17 ± 231.32 | ### |
| <b>Limb-Appendicular Skeletal Muscle Mass Index (L-ASMI) (g/m<sup>2</sup>)</b> | 461.82 ± 74.36 | 487.20 ± 49.06 | 308.64 ± 50.98  | ##  | 320.10 ± 28.34   | ### |

Note: Data are means ± SD. Statistical comparisons: # wild-type vs. ob/ob; ##*P* < 0.01, ###*P* < 0.001.
